# Supplementary material for: High-Frequency Nanosecond Bleomycin Electrochemotherapy and its Effects on Changes in the Immune System and Survival
Source: MDPI journal article supplement (doi:10.3390/cancers14246254), 2022-12-19
Supplement: s1 [file s1]

Supplementary data

Table S1. Antibodies used for the multicolour flow cytometry.

| Anti-mouse antibodies against cell markers: | Conjugated fluorochromes | Abbreviation     | Producers                                              | Catalog#    | Dilution |
|---------------------------------------------|--------------------------|------------------|--------------------------------------------------------|-------------|----------|
| B220                                        | PE                       | B220-PE          | BD Biosciences, USA                                    | 553090      | 1:800    |
|                                             | PerCP                    | B220-PerCP       |                                                        | 553093      | 1:200    |
|                                             | FITC                     | B220-FITC        | BioLegend, USA                                         | 103205      | 1:800    |
| CD11b (Mac1)                                | APC                      | CD11b-APC        | Miltenyi Biotec GmbH, Germany                          | 130-113-803 |          |
|                                             | PE-TexasRed              | CD11b-PE-TxRed   | eBioscience, Invitrogen, Thermo Fisher Scientific, USA | RM2817      |          |
| CD11c                                       | PE-TexasRed              | CD11c-PE-TxRed   |                                                        | MCD11c17    | 1:200    |
| CD138                                       | APC                      | CD138-APC        |                                                        | MA5-23553   |          |
| CD163                                       | PE                       | CD163-PE         |                                                        | 12-1631-82  |          |
| CD19                                        | eFluor506                | CD19-eF506       |                                                        | 69-0193-82  | 1:800    |
| CD1d                                        | eFluor450                | CD1d-eF450       |                                                        | 48-0011-82  |          |
| CD24                                        | PerCP-eFluor710          | CD24-PerCP-eF710 |                                                        | 46-0242-80  |          |
| CD25                                        | APC                      | CD25-APC         |                                                        | 12-0251-81  | 1:200    |
| CD27                                        | Super Bright 600         | CD27-SB600       |                                                        | 63-0271-82  | 1:400    |
| CD3e                                        | FITC                     | CD3-FITC         |                                                        | 11-0031-85  | 1:800    |
|                                             | eFluor450                | CD3-eF450        |                                                        | 48-0032-82  | 1:100    |
| CD31                                        | PE                       | CD31-PE          | BD Biosciences, USA                                    | 553373      | 1:400    |
| CD4                                         | PerCP                    | CD4-PerCP        |                                                        | 553052      | 1:800    |
|                                             | Alexa Fluor 647          | CD4-AF647        |                                                        | 557681      |          |
|                                             | PE                       | CD4-PE           | Miltenyi Biotec GmbH, Germany                          | 130-091-607 |          |
| CD40                                        | eFluor450                | CD40-eF450       | eBioscience, Invitrogen, Thermo Fisher Scientific, USA | 48-0402-82  | 1:200    |
| CD43                                        | PE                       | CD43-PE          | Miltenyi Biotec GmbH, Germany                          | 130-091-585 |          |

|                                       |                         |                   |                                                              |                 |                  |
|---------------------------------------|-------------------------|-------------------|--------------------------------------------------------------|-----------------|------------------|
| CD44                                  | eFluor450               | CD44-eF450        | eBioscience,<br>Invitrogen, Thermo<br>Fisher Scientific, USA | 48-0441-82      | 1:400            |
|                                       | FITC                    | CD44-FITC         | BD Biosciences, USA                                          | 553133          | 1:800            |
|                                       | PE                      | CD44-PE           |                                                              | 553134          | 1:400            |
| CD5                                   | PE                      | CD5-PE            |                                                              | 553023          | 1:800            |
| CD62L                                 | APC                     | CD62L-APC         | Miltenyi Biotec<br>GmbH, Germany                             | 130-091-805     | 1:200            |
| CD80 (B7-1)                           | Super Bright<br>600     | CD80-SB600        | eBioscience,<br>Invitrogen, Thermo<br>Fisher Scientific, USA | 63-0801-82      | 1:400            |
| CD86 (B7-2)                           | FITC                    | CD86-FITC         |                                                              | 11-0862-82      | 1:800            |
| CD88<br>(C5aR)                        | Alexa Fluor<br>488      | CD88-AF488        | Bio-Rad<br>Laboratories, USA                                 | MCA2456A<br>488 |                  |
| CD8                                   | FITC                    | CD8-FITC          | BD Biosciences, USA                                          | 553031          | 1:400            |
|                                       | PE                      | CD8-PE            |                                                              | 553041          | 1:800            |
|                                       | Alexa Fluor<br>700      | CD8-AF700         | eBioscience,<br>Invitrogen, Thermo<br>Fisher Scientific, USA | 56-0081-82      | 1:200            |
| CD49b<br>(DX5)                        | APC-Cy7                 | CD49b-APC-<br>Cy7 |                                                              | A15420          | 1:400            |
| F4/80                                 | Alexa Fluor<br>647      | F4/80-AF647       |                                                              | MF48021         |                  |
| FR4                                   | Brilliant<br>Violet 421 | FR4-BV421         | BD Biosciences, USA                                          | 744119          | 1:800            |
| GITR<br>(CD357)                       | Super Bright<br>600     | GITR-SB600        | eBioscience,<br>Invitrogen, Thermo<br>Fisher Scientific, USA | 63-5874-82      |                  |
| Gr-1                                  | PE                      | Gr-1-PE           | BioLegend, USA                                               | 108407          |                  |
|                                       | FITC                    | Gr-1-FITC         | Miltenyi Biotec<br>GmbH, Germany                             | 130-102-338     |                  |
| MHCII                                 | FITC                    | MHCII-FITC        |                                                              | 130-123-666     | 1:50             |
| PD-1<br>(CD279)                       | eFluor506               | PD1-eF506         | eBioscience,<br>Invitrogen, Thermo<br>Fisher Scientific, USA | 69-9985-82      | 1:400            |
| PD-L1<br>(CD274)                      | Super Bright<br>600     | PD-L1-SB600       |                                                              | 63-5982-82      | 1:800            |
| Rat IgG1<br>kappa Isotype<br>Control  | Brilliant<br>Violet 421 | Iso-BV421         | BD Biosciences, USA                                          | 562868          | 1:400            |
|                                       | Super Bright<br>600     | Iso-SB600         | eBioscience,<br>Invitrogen, Thermo<br>Fisher Scientific, USA | 63-4031-30      | 1:400 –<br>1:800 |
| Rat IgG2a<br>kappa Isotype<br>Control | PE                      | Iso-PE            |                                                              | 12-4321-81      | 1:200 –<br>1:800 |
|                                       | eFluor506               | Iso-eF506         |                                                              | 69-4321-82      | 1:400 –<br>1:800 |

|                     |    |                         |                     |        |       |
|---------------------|----|-------------------------|---------------------|--------|-------|
| TCR $\gamma/\delta$ | PE | TCR $\gamma/\delta$ -PE | BD Biosciences, USA | 553178 | 1:400 |
| Ter119              |    | Ter119-PE               |                     | 553673 | 1:200 |

- Goat anti-mouse IgG AF488 (eBioscience, Invitrogen, Thermo Fisher Scientific, USA).
- Anti-mouse Fc $\gamma$ R (Fc block) – supernatant from hybridoma cells secreting monoclonal antibodies against Fc receptor (home-made, CIM, Lithuania).
- Fluorescent stains: Yo-Pro-1, 0.1nM (Life Technologies, Thermo Fisher Scientific, USA); LIVE/DEAD™ Fixable Near-IR Stain (Thermo Fisher Scientific, USA).

Table S2. Expression of cell surface markers on Lin<sup>-</sup> population in spleens.

| Receptors   | Expression | Number of mice used for analysis | Function of the receptor                                                                                                                                                                                                                                  |  |
|-------------|------------|----------------------------------|-----------------------------------------------------------------------------------------------------------------------------------------------------------------------------------------------------------------------------------------------------------|--|
| CD5         | 0–8 %      | 2                                | Suppressor function. Marker of T and B cells                                                                                                                                                                                                              |  |
| F4/80       | 4–8 %      | 2                                | Marker of murine macrophages                                                                                                                                                                                                                              |  |
| CD44        | 5–7 %      | 2                                | Marker of at least once re-activated lymphocytes                                                                                                                                                                                                          |  |
| GITR        | 0–10 %     | 2                                | Marker of multiple times re-activated lymphocytes                                                                                                                                                                                                         |  |
| CD40        | 1–13 %     | 43                               | Marker of activated antigen presenting cells                                                                                                                                                                                                              |  |
| CD49b (DX5) | 5–10 %     | 2                                | Marker of NK, NKT, Tr1 cells                                                                                                                                                                                                                              |  |
| MHC II      | 5–45 %     | 43                               | Marker of antigen presenting cells                                                                                                                                                                                                                        |  |
| CD80        | 10–50 %    | 43                               | Marker of antigen presenting cells (B cells, macrophages, and DCs). Costimulatory molecule for T-cell activation and regulation of the activity of normal and malignant B cells.                                                                          |  |
| PD-L1       | 20–77 %    | 43                               | Suppressor ligand expressed on APCs and B cells. Suppression of lymphocytes expressing PD-1 receptor.                                                                                                                                                     |  |
| CD163       | 20–78 %    | 43                               | Polarization marker for pro-inflammatory macrophages                                                                                                                                                                                                      |  |
| CD86        | 30–85 %    | 43                               | Co-activation ('Signal 2') for antigen presentation                                                                                                                                                                                                       |  |
| CD24        | 42–98 %    | 43                               | This marker is expressed on hematopoietic and cancer cells. Can function as 'don't eat me' signal, inhibiting phagocytic of APCs like macrophages. Involved in discrimination between DAMP and PAMP signalling pathways. All functions are still unclear. |  |

Table S3. Statistically significant changes ( $p < 0.05$ ) in immune cell populations and their surface markers after ECT, compared to untreated tumour-bearing mice.

|                                                | Time-dependent study |            | Time-independent study |            |                      |
|------------------------------------------------|----------------------|------------|------------------------|------------|----------------------|
|                                                | In spleens           | In tumours | In spleens             | In tumours | In lymph nodes       |
| All T cells                                    | ↓ nsECT1             | –          | ↑ $\mu$ sECT, nsECT4   | –          | –                    |
| CD4 <sup>+</sup> CD8 <sup>+</sup> (DP) T cells | ↑ nsECT2/4           | –          | ↓ nsECT4               | –          | ↑ $\mu$ sECT, nsECT4 |
| CD4 <sup>+</sup> CD8 <sup>-</sup> (DN) T cells | –                    | –          | ↓ $\mu$ sECT, nsECT4   | –          | –                    |
| Helper CD4 <sup>+</sup> T cells                | ↓ nsECT1             | –          | ↑ $\mu$ sECT, nsECT4   | ↑ nsECT4   | ↑ $\mu$ sECT, nsECT4 |

|                                                 |                     |                     |                     |                     |                     |
|-------------------------------------------------|---------------------|---------------------|---------------------|---------------------|---------------------|
| CD4 <sup>+</sup> Tr1 cells                      | ↑ nsECT3            | –                   | –                   | –                   | –                   |
| CD4 <sup>+</sup> Treg                           | –                   | –                   | ↓ nsECT4            | –                   | ↑ nsECT4            |
| Cytotoxic CD8 <sup>+</sup> T cells              | ↓ μsECT             | –                   | ↑ nsECT3            | ↓ μsECT             | –                   |
| Memory CD8 <sup>+</sup> T cells                 | <i>not assessed</i> | <i>not assessed</i> | –                   | ↓ nsECT4            | –                   |
| CD4/CD8 ratio                                   | –                   | ↑                   | –                   | ↑ μsECT, nsECT4     | –                   |
| B cells                                         | ↓                   | ↑ μsECT             | –                   | –                   | ↓ nsECT4            |
| Memory B cells                                  | –                   | <i>not assessed</i> | –                   | –                   | –                   |
| Plasma cells                                    | ↑ nsECT3/4          | <i>not assessed</i> | –                   | –                   | –                   |
| NK cells                                        | <i>not assessed</i> | <i>not assessed</i> | –                   | –                   | ↑ μsECT, nsECT4     |
| NKT cells                                       | <i>not assessed</i> | <i>not assessed</i> | –                   | –                   | ↑ μsECT, nsECT4     |
| Monocytes / Macrophages                         | –                   | ↑ nsECT2            | –                   | –                   | –                   |
| CD11b <sup>+</sup> DC                           | –                   | –                   | –                   | –                   | ↓ nsECT4            |
| CD11b <sup>–</sup> DC                           | –                   | ↓ nsECT2/4          | –                   | –                   | –                   |
| CD163 <sup>+</sup> /CD163 <sup>–</sup> MΦ ratio | <i>not assessed</i> | ↓ nsECT2            | <i>not assessed</i> | <i>not assessed</i> | <i>not assessed</i> |
| “Negative” population                           | ↑ nsECT1/2          | –                   | ↑                   | ↓ μsECT             | ↓ μsECT, nsECT4     |

Table S4. Statistically significant changes ( $p < 0.05$ ) in immune cell surface markers after ECT, compared to untreated tumour-bearing mice.

| Marker              | Time-dependent study               |                     |                     | Time-independent study |                     |                     |
|---------------------|------------------------------------|---------------------|---------------------|------------------------|---------------------|---------------------|
|                     | Immune cell populations            | In spleens          | In tumours          | In spleens             | In tumours          | In lymph nodes      |
| GITR <sup>+</sup>   | CD4 <sup>+</sup> T <sub>EM</sub>   | ↓ nsECT2/4          | –                   | –                      | –                   | –                   |
|                     | CD4 <sup>+</sup> T <sub>Reg</sub>  | ↓ μsECT, nsECT4     | ↑ nsECT3            | –                      | –                   | –                   |
|                     | CD4 <sup>+</sup> Tr1               | ↓ nsECT4            | –                   | –                      | –                   | –                   |
| CD44 <sup>+</sup>   | Cytotoxic CD8 <sup>+</sup> T cells | –                   | –                   | –                      | ↓ nsECT4            | –                   |
|                     | CD4 <sup>+</sup> T <sub>CM</sub>   | –                   | ↑                   | –                      | –                   | –                   |
|                     | CD4 <sup>+</sup> T <sub>EM</sub>   | –                   | ↑ nsECT2            | –                      | –                   | –                   |
|                     | CD4 <sup>+</sup> T <sub>Reg</sub>  | –                   | ↑ nsECT2            | –                      | –                   | –                   |
| CD40 <sup>+</sup>   | “Negative” population              | –                   | –                   | ↑ μsECT, nsECT4        | –                   | ↑ μsECT             |
|                     | B cells                            | ↓                   | –                   | –                      | –                   | –                   |
| PD-L1 <sup>+</sup>  | “Negative” population              | –                   | ↓ nsECT3/4          | –                      | –                   | –                   |
|                     | CD163 <sup>–</sup> MΦ ratio        | –                   | ↓ nsECT4            | –                      | –                   | –                   |
|                     | CD11b <sup>–</sup> DC              | –                   | ↓ nsECT3            | –                      | –                   | ↓ nsECT4            |
|                     | CD11b <sup>+</sup> DC              | –                   | ↓ nsECT4            | ↑ μsECT, nsECT4        | –                   | –                   |
|                     | CD31 <sup>+</sup> Monocytes        | –                   | –                   | –                      | –                   | ↓ nsECT4            |
|                     | MDSC                               | –                   | –                   | –                      | ↑ nsECT4            | –                   |
| CD86 <sup>+</sup>   | “Negative” population              | –                   | ↓                   | –                      | ↑ nsECT4            | –                   |
| CD24 <sup>+</sup>   | “Negative” population              | –                   | ↑ nsECT2/3/4        | –                      | –                   | –                   |
| MHCII               | “Negative” population              | ↓ nsECT2/3, μsECT   | –                   | –                      | –                   | –                   |
| CD31 <sup>+</sup>   | CD11b <sup>+</sup> DC              | –                   | –                   | –                      | –                   | ↓ μsECT             |
|                     | Monocytes                          | ↑ nsECT3/4, μsECT   | –                   | –                      | –                   | –                   |
| Ter119 <sup>+</sup> | Erythrocytes                       | <i>not assessed</i> | <i>not assessed</i> | ↓ μsECT, nsECT4        | <i>not assessed</i> | <i>not assessed</i> |

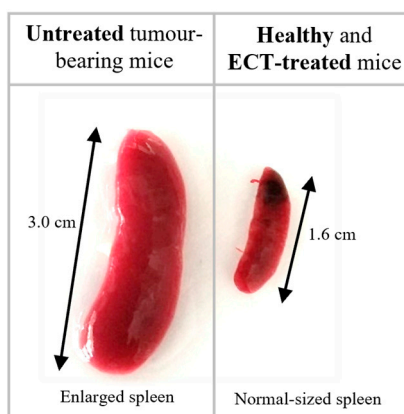

**Figure S1.** Spleens of ECT-treated and untreated tumour-bearing mice.

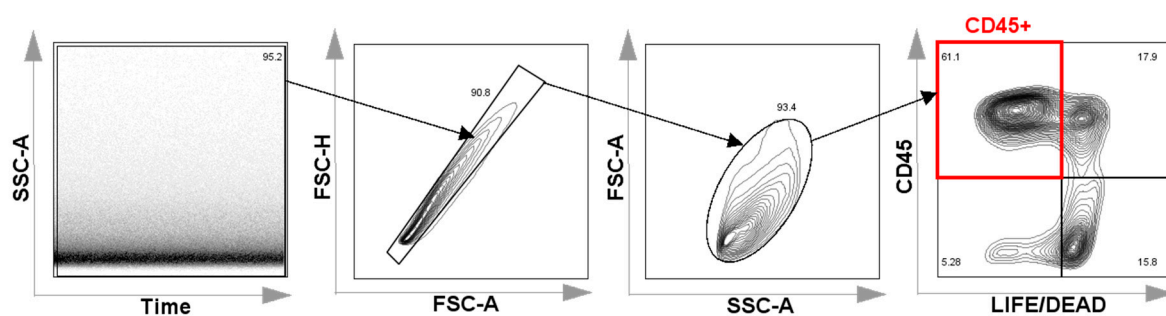

**Figure S2.** Common gating strategy to discriminate singlets, live and immune cells.

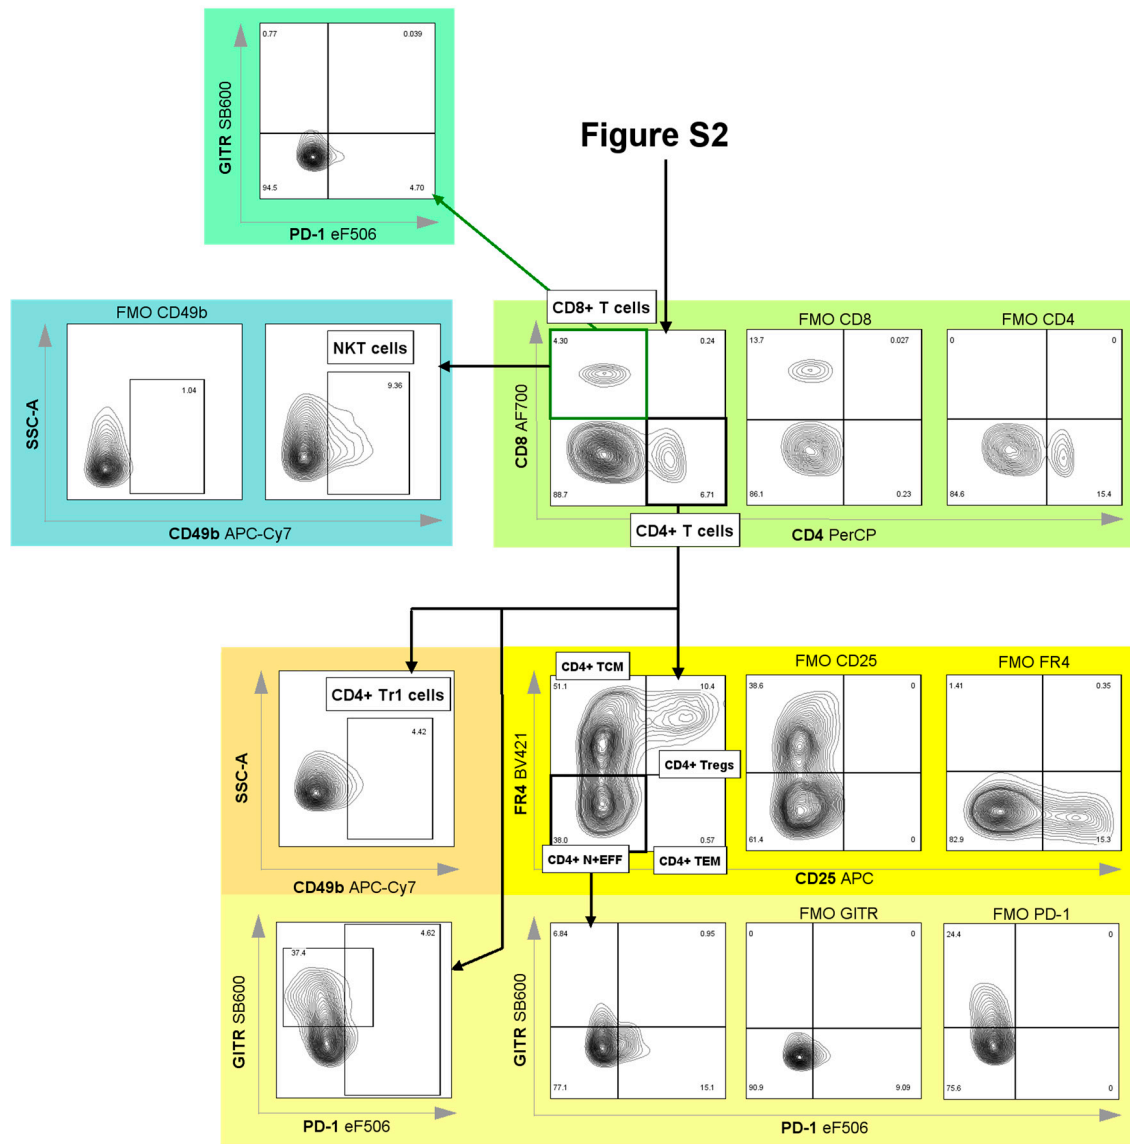

**Figure S3.** Gating strategy of T and NKT cells.



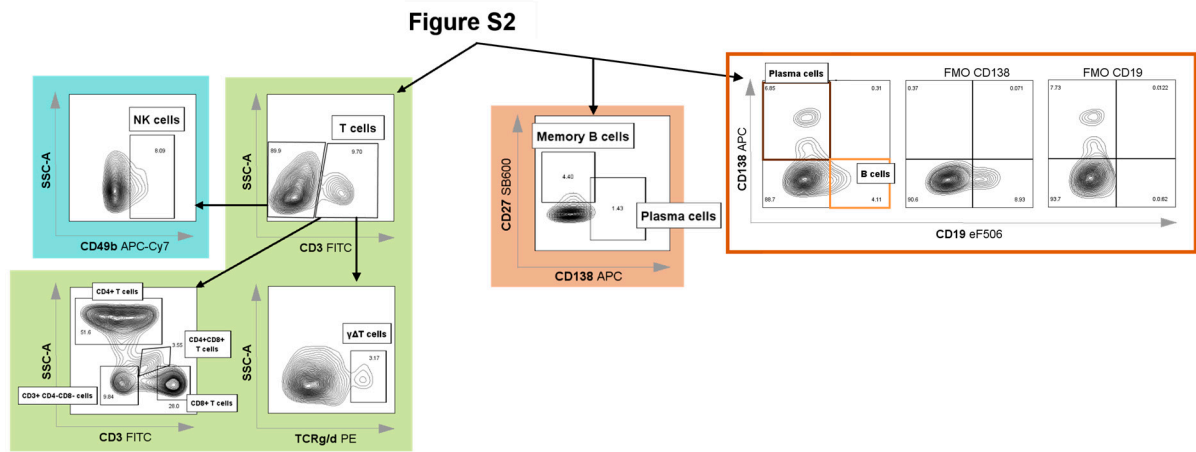

**Figure S6.** Gating strategy of B cell subsets.

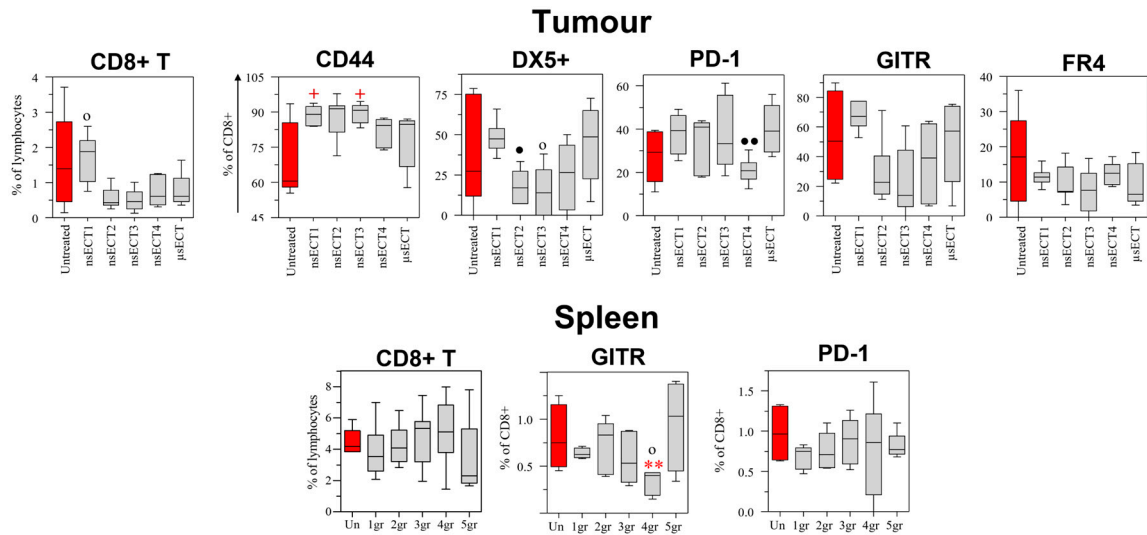

**Figure S7.** CD8<sup>+</sup> T lymphocytes analysis in time-dependent study. Cytometry was performed with BD FACSAria III cytometer. Statistically significant (\*\* p < 0.005) differences and tendencies (+ p = 0.05–0.1) compared to the untreated group. Significant differences (● p < 0.05; ●● p < 0.005) and tendencies (o p = 0.05–0.1) compared to μsECT group.



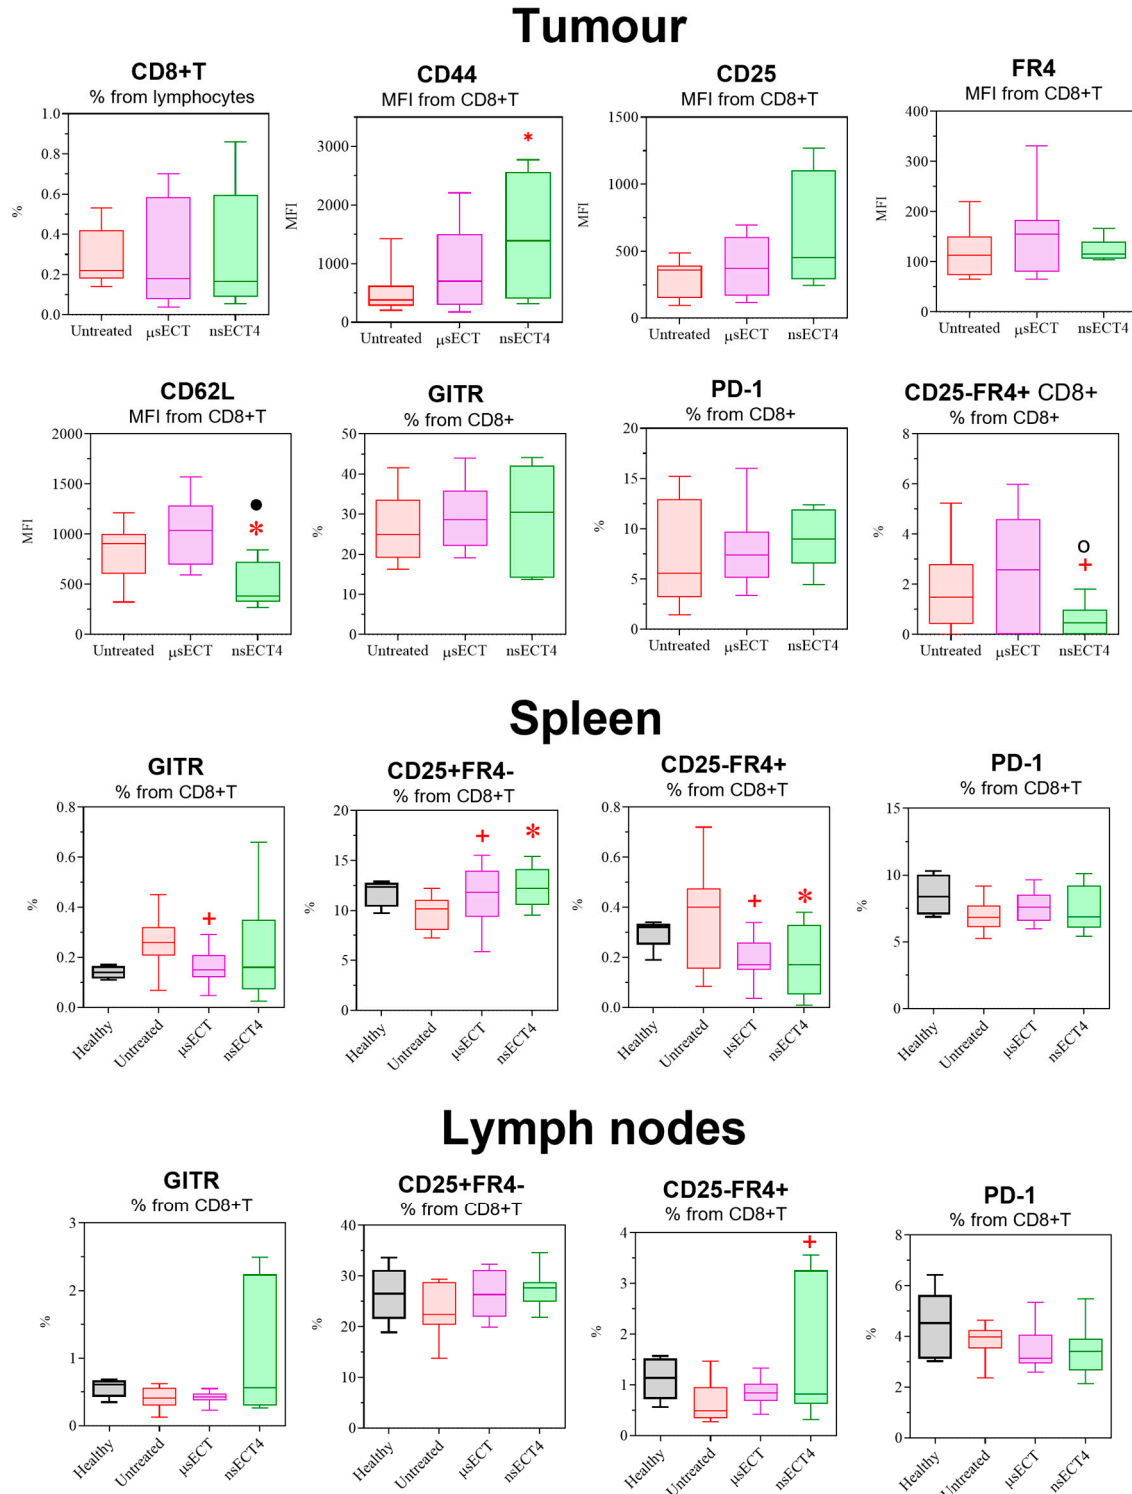

**Figure S8.** CD8<sup>+</sup> T lymphocytes analysis in time-independent study. Cytometry was performed with BD FACSaria III cytometer. Statistically significant (\*  $p < 0.05$ ) differences and tendencies (+  $p = 0.05 - 0.1$ ) compared to the untreated group. Significant differences (●  $p < 0.05$ ) and tendencies (○  $p = 0.05 - 0.1$ ) compared to  $\mu$ sECT group.
